# Supplementary material
Source: Research Square preprint supplement (doi:10.21203/rs.3.rs-10309602/v1)
Supplement: Supplementary file 1 [file 1822b4aba46ef53cffd7643c.docx]

**EXTRACTED SCIENTIFIC DATA TABLES**

**Table 01.** HPLC Area Percent Report. Extract Type: Methanolic Extract of Flowers (Lantana camara L.). Sample Name: *Lantana camara* L. Flower Extract. Column Type: C18 (251mm x 4.6mm, 5µm) | Flow Rate: 1.0 mL/min

| Peak | Retention time (tR) [min] | Width [min] | Area [mAU*s] | Height [mAU] | Area % | Compound Name (Identified) |
| --- | --- | --- | --- | --- | --- | --- |
| 1 | 4.105 | 0.2589 | 56.413 | 5.150 | 5.1907 | Lantanoside |
| 2 | 6.327 | 0.2943 | 26.771 | 2.150 | 2.4633 | Chlorogenic acid |
| 3 | 6.808 | 0.1766 | 3.362 | 0.450 | 0.3093 | Compound 001 |
| 4 | 8.561 | 0.3531 | 185.999 | 12.450 | 17.1141 | Verbascoside (Acteoside) |
| 5 | 9.221 | 0.2354 | 30.875 | 3.100 | 2.8409 | Isoverbascoside |
| 6 | 10.673 | 0.1766 | 5.604 | 0.750 | 0.5156 | Caffeic acid |
| 7 | 11.150 | 0.1766 | 5.978 | 0.800 | 0.5500 | Compound 002 |
| 8 | 12.431 | 0.4119 | 276.226 | 15.850 | 25.4161 | Quercetin-3-O-glucoside |
| 9 | 13.729 | 0.3296 | 126.903 | 9.100 | 11.6766 | Rutin |
| 10 | 18.161 | 0.3766 | 179.257 | 11.250 | 16.4938 | Luteolin |
| 11 | 18.231 | 0.1412 | 2.688 | 0.450 | 0.2473 | Compound 003 |
| 12 | 21.548 | 0.2943 | 68.485 | 5.500 | 6.3014 | Apigenin |
| 13 | 23.543 | 0.1766 | 4.857 | 0.650 | 0.4469 | Compound 004 |
| 14 | 25.309 | 0.3531 | 69.469 | 4.650 | 6.3920 | Ursolic acid |
| 15 | 26.907 | 0.3296 | 43.928 | 3.150 | 4.0419 | Oleanolic acid |

**Table 02.** Acarbose Molecular Docking Matrix (1HNY Target). Target: Human Pancreatic α-Amylase (PDB: 1HNY), Torsional Degrees of Freedom: 26, Torsional Entropy Penalty: +7.76 kcal/mol.

| Rank / Run ID | Est. Free Energy of Binding (kcal/mol) | Estimated Inhibition Constant (mM) | Final Intermolecular Energy (kcal/mol) | vdW + H-Bond + Desolv. (kcal/mol) | Electrostatic component (kcal/mol) |
| --- | --- | --- | --- | --- | --- |
| Run 5 | -1.06 | 167.07 | -8.82 | -7.40 | -1.41 |
| Run 4 | -0.74 | 285.93 | -8.50 | -7.48 | -1.01 |
| Run 2 | +1.43 | - | -6.33 | -5.68 | -0.65 |
| Run 1 | +2.47 | - | -5.28 | -4.83 | -0.46 |
| Run 3 | +3.49 | - | -4.27 | -4.50 | +0.24 |
| Run 6 | +3.54 | - | -4.21 | -4.39 | +0.18 |
| Run 7 | +4.13 | - | -3.63 | -3.83 | +0.20 |
| Run 8 | +4.45 | - | -3.31 | -3.53 | +0.22 |
| Run 9 | +4.65 | - | -3.10 | -3.54 | +0.44 |
| Run 10 | +5.31 | - | -2.44 | -2.90 | +0.46 |

**Table 03.** Verbascoside Molecular Docking Matrix (1HNY Target). Target: Human Pancreatic α-Amylase (PDB: 1HNY), Torsional Degrees of Freedom: 20, Torsional Entropy Penalty: +5.97 kcal/mol.

| Rank / Run ID | Est. Free Energy of Binding (kcal/mol) | Estimated Inhibition Constant (mM) | Final Intermolecular Energy (kcal/mol) | vdW + H-Bond + Desolv. (kcal/mol) | Electrostatic component (kcal/mol) |
| --- | --- | --- | --- | --- | --- |
| Run 3 | -2.17 | 25.49 | -8.14 | -7.77 | -0.37 |
| Run 1 | -1.82 | 46.32 | -7.79 | -7.43 | -0.35 |
| Run 2 | -1.49 | 80.41 | -7.46 | -6.96 | -0.50 |
| Run 7 | -1.33 | 105.74 | -7.30 | -7.03 | -0.27 |
| Run 10 | -1.25 | 120.37 | -7.22 | -6.82 | -0.40 |
| Run 9 | -1.14 | 144.75 | -7.11 | -6.83 | -0.28 |
| Run 4 | -1.13 | 148.65 | -7.10 | -6.81 | -0.29 |
| Run 8 | -1.12 | 150.31 | -7.09 | -6.65 | -0.44 |
| Run 6 | -1.06 | 166.30 | -7.03 | -6.66 | -0.37 |
| Run 5 | -0.99 | 186.27 | -6.96 | -6.58 | -0.38 |

**Table 04.** Luteolin Molecular Docking Matrix (1HNY Target). Target: Human Pancreatic α-Amylase (PDB: 1HNY), Torsional Degrees of Freedom: 5, Torsional Entropy Penalty: +1.49 kcal/mol.

| Rank / Run ID | Est. Free Energy of Binding (kcal/mol) | Estimated Inhibition Constant (µM) | Final Intermolecular Energy (kcal/mol) | Electrostatic component (kcal/mol) | vdW + H-Bond + Desolv. (kcal/mol) |
| --- | --- | --- | --- | --- | --- |
| Run 6 | -6.43 | 19.22 | -7.93 | -0.65 | -7.27 |
| Run 8 | -6.39 | 20.76 | -7.88 | -0.48 | -7.40 |
| Run 3 | -5.72 | 64.38 | -7.21 | -0.31 | -6.90 |
| Run 9 | -5.66 | 70.58 | -7.15 | -0.23 | -6.92 |
| Run 1 | -5.66 | 71.39 | -7.15 | -0.23 | -6.92 |
| Run 2 | -5.64 | 73.23 | -7.13 | -0.24 | -6.90 |
| Run 4 | -5.64 | 73.39 | -7.13 | -0.24 | -6.89 |
| Run 7 | -5.61 | 76.88 | -7.10 | -0.46 | -6.64 |
| Run 10 | -5.57 | 83.02 | -7.06 | -0.21 | -6.85 |
| Run 5 | -5.29 | 131.98 | -6.78 | -0.48 | -6.30 |
